# Supplementary material
Source: Springer Nature journal article supplement (https://www.springermedizin.de/resource/supplementary/12916_2011_436_MOESM9_ESM.pdf/9599950)

$1/\sigma = 2$  days,  $1/\nu = 4$  days,  $\beta = 15 \cdot 10^{-5} \text{ s}^{-1}$

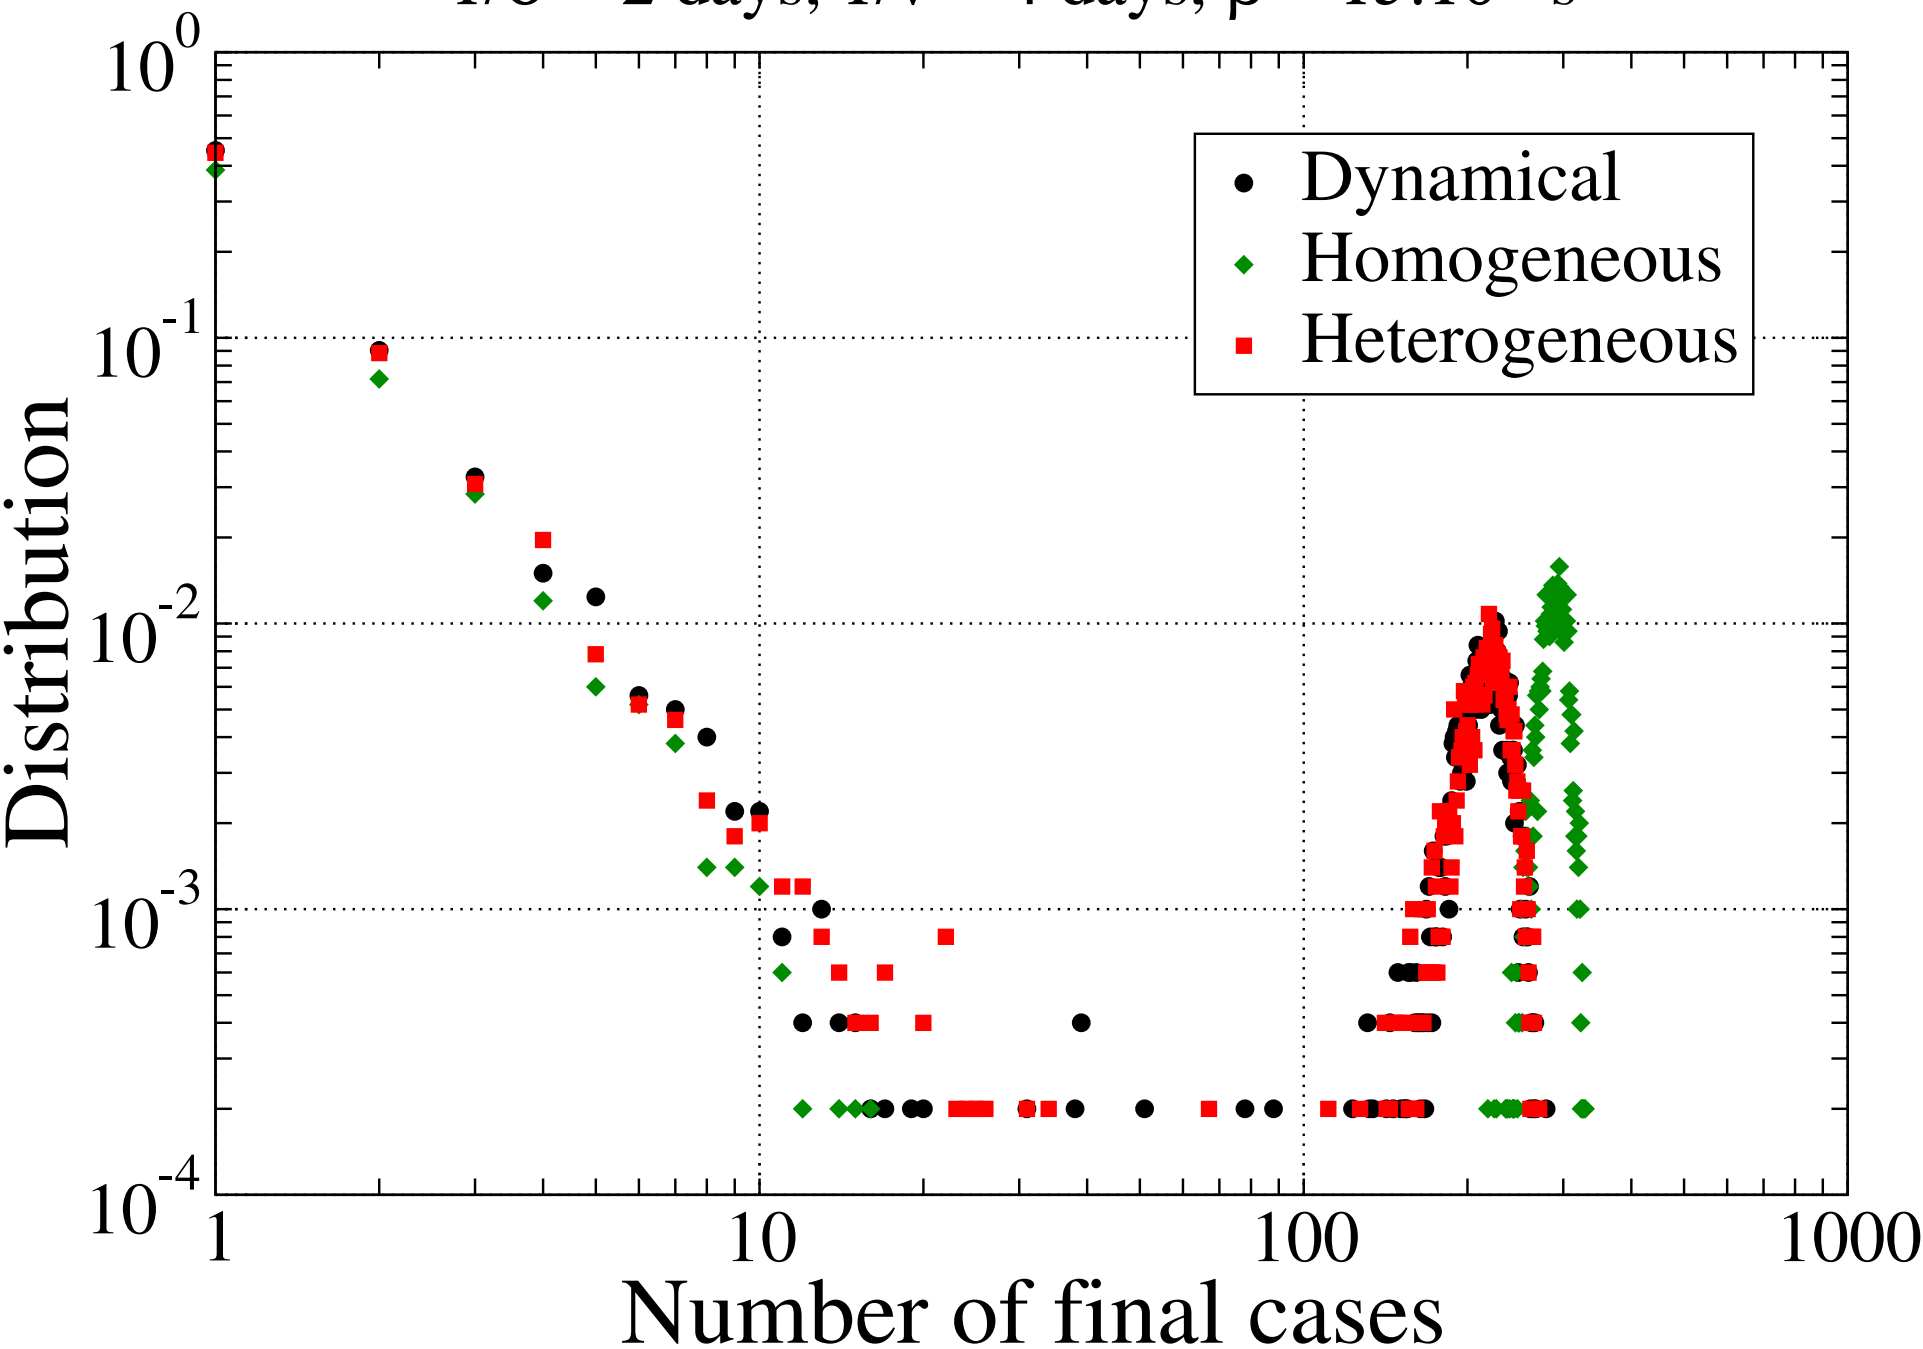

Supplement: MOESM9 [file 9599950]
